# Supplementary material for: Environmental conditions shape the nature of a minimal bacterial genome
Source: Nat Commun. 2019 Jul 15;10:3100. doi: 10.1038/s41467-019-10837-2 (PMC6629657; doi:10.1038/s41467-019-10837-2)
Supplement: Supplementary file 1 — Supplementary Information [file 41467_2019_10837_MOESM1_ESM.pdf]

# **Environmental conditions shape the nature of a minimal bacterial genome**

Magdalena Antczak, Martin Michaelis\*, Mark N Wass\*

School of Biosciences, University of Kent, Canterbury, Kent, CT2 7NJ, UK

\*to whom correspondence should be addressed: [m.n.wass@kent.ac.uk](mailto:m.n.wass@kent.ac.uk)

[m.michaelis@kent.ac.uk](mailto:m.michaelis@kent.ac.uk)

## **Supplementary Material**

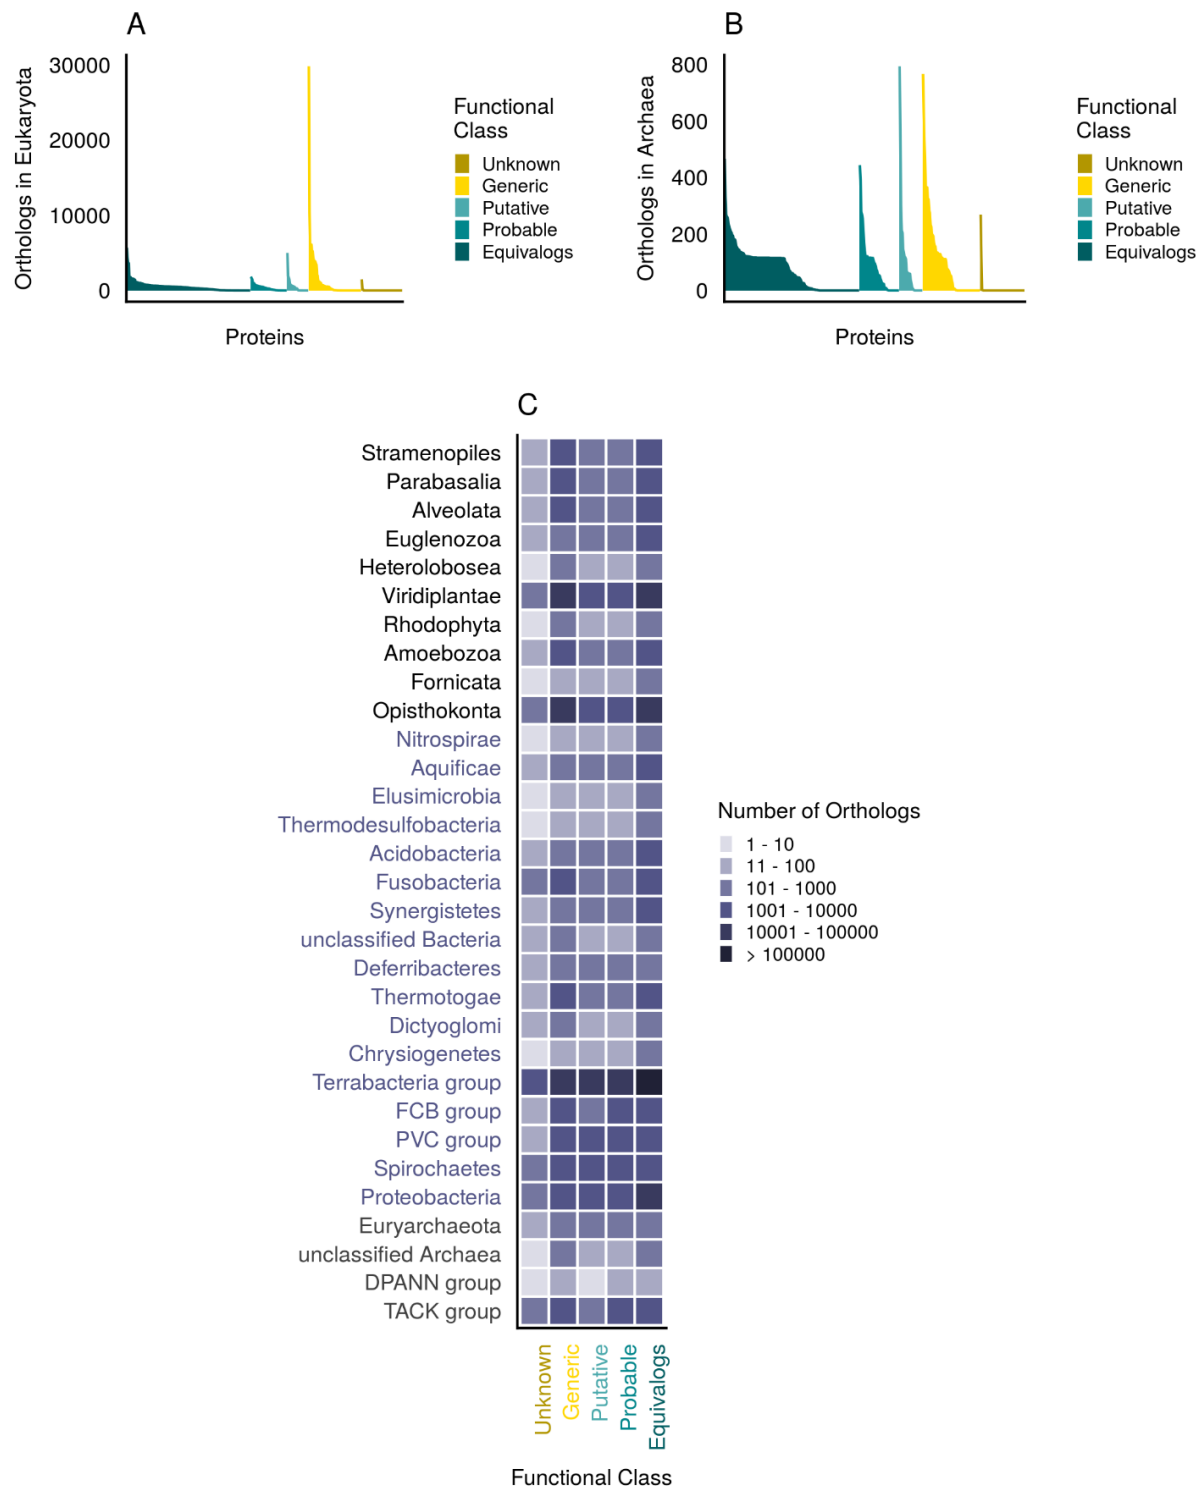

**Supplementary Figure 1.** Orthologs of proteins in the minimal bacterial genome. The number of orthologs for each protein identified in A) archaea and B) eukaryota. Results for each functional class are represented by a different colour: golden for the Unknown functional class, yellow – Generic, light turquoise – Putative, turquoise – Probable, dark turquoise – Equivalog. C) Summary of the total number of orthologs identified across different phyla for each of the functional confidence groups. The names of phyla from eukaryota are displayed in black, bacteria in red and archaea in grey.

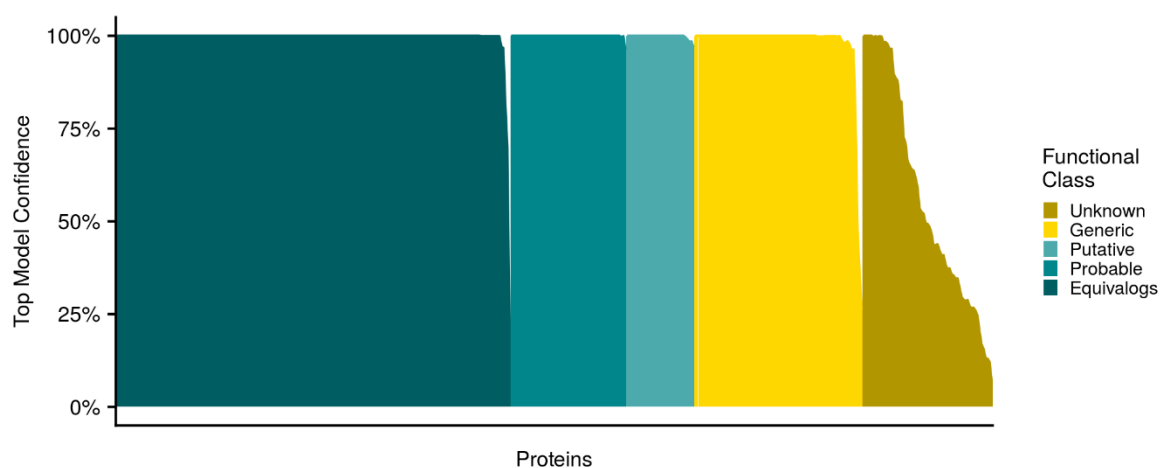

**Supplementary Figure 2.** Confidence of the top structural template identified by Phyre2. The confidence score (0-100) is shown for the top scoring template identified for each of the proteins in the minimal genome. The score indicates the confidence that the template protein sequence and the minimal genome protein sequence are homologs. Results for each functional class are represented by a different colour: golden for the Unknown functional class, yellow – Generic, light turquoise – Putative, turquoise – Probable, dark turquoise – Equivalog.

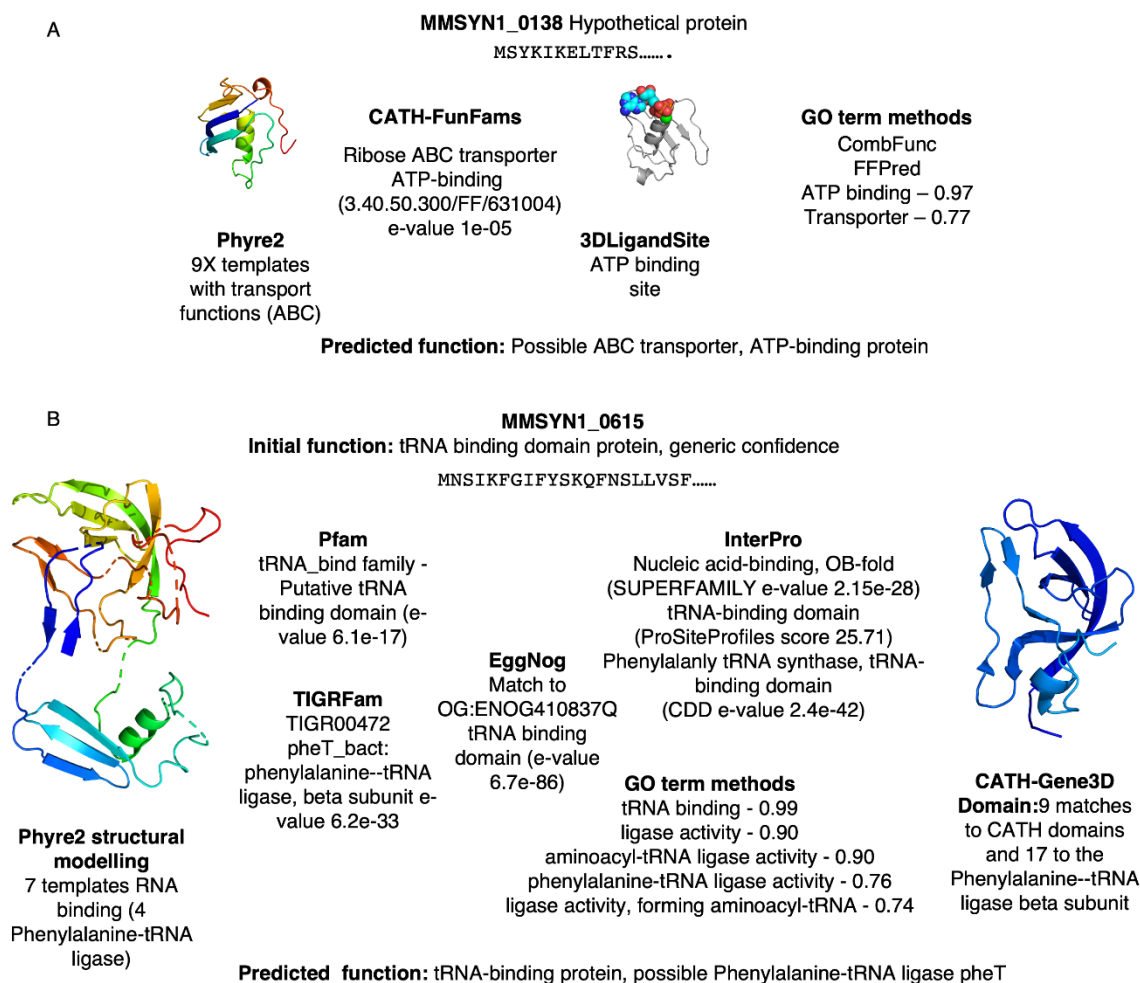

**Supplementary Figure 3.** Examples of proteins in the minimal bacterial genome that where it was difficult to predict their function. A) Protein MMSYN\_0138 was previously completely uncharacterised and listed as a hypothetical protein. Predictions for MMSYN\_0138 by multiple methods identify a relationship to ATP binding domains of ABC transporters but the functional residues involved in ATP binding are not conserved making this function less likely. B) Protein MMSYN\_0615 was previously classified as a tRNA binding protein in the Generic confidence class. Multiple predictions suggest that it could be a Phenylalanine-tRNA ligase  $\beta$  subunit, however the  $\beta$  subunit in other bacteria typically contains around 800 residues, whereas MMSYN\_0615 is only 202 residues. It therefore seems that tRNA binding is likely but the role of this function is not known.

A

**MMSYN1\_0165****Initial function:** AmiC?**Confidence class:** Generic

MKSTLTKQEVNLNSEL.....

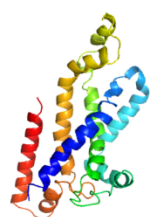**TIGRFam**

nickel\_nikB: nickel ABC transporter, permease subu (e-value 4e-22)

**Pfam**

Binding-protein-dependent transport system inner membrane component (e-value 1.1e-22)

**TrSSP**

Amino acid transporter

**Phyre2 structural modelling**

Several confident matches to templates of ABC transporter, permease

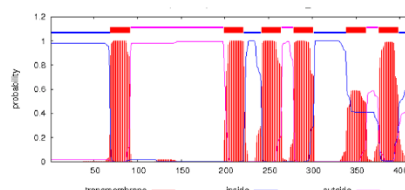**TMHMM**

Predicted 6 TM helices

**CATH-FunFams**

Oligopeptide ABC transporter permease (1.10.3720.10/FF/58662) e-value 1.7e-21

**GO term methods**

Multiple high confidence predictions associated with transmembrane transporter functions

**EggNog**

Match to OG: ENOG41082QK ABC transporter (Permease (e-value 1.85e-104) Predicted gene: oppB

**InterPro**

ABC transporter type 1, transmembrane domain Met1-like (CDD e-value 1.87e-12; ProSiteProfiles score 10.45)

**Predicted function:** Oligopeptide ABC transporter, permease OppB (AmiC)

B

**MMSYN1\_0166****Initial function:** AmiD?**Confidence class:** Generic

MKTKQLEQPDFSALLDSERE.....

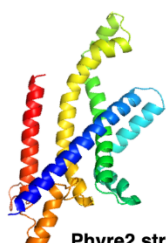**TIGRFam**

nickel\_nikC: nickel ABC transporter, permease subu (e-value 9.2e-25)

**Pfam**

Binding-protein-dependent transport system inner membrane component (e-value 6.4e-16)

**TrSSP**

Anion transporter

**Phyre2 structural modelling**

Several confident matches to templates of ABC transporter, permease

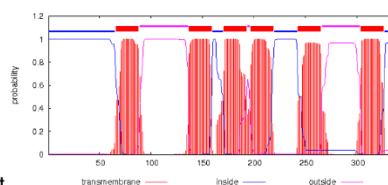**TMHMM**

Predicted 6 TM helices

**CATH-FunFams**

Oligopeptide ABC transporter permease OppC (1.10.3720.10/FF/58605) e-value 1.2e-29

**GO term methods**

Multiple high confidence predictions associated with transmembrane transporter functions

**EggNog**

Match to OG: ENOG4107SI6 transport system permease protein (e-value 1.67e-146) Predicted gene: oppC2

**InterPro**

ABC transporter type 1, transmembrane domain Met1-like (CDD e-value 7.43e-09; ProSiteProfiles score 17.83)

**Predicted function:** Oligopeptide ABC transporter, permease OppC (AmiD)

C

**MMSYN1\_0167****Initial function:** AmiE?**Confidence class:** Generic

MKNVILSIKDLVVKFRVRSK.....

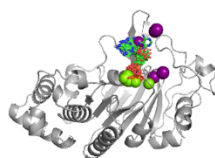**3DLigandSite**

ATP binding site

**EggNog**

Match to OG: ENOG411CA8C oligopeptide abc transporter atp-binding protein (4.4e-175) Predicted gene: oppD

**TIGRFam**

Matches to ABC transporters, ATP-binding component

**GO term methods**ATP binding - 0.99  
ATPase activity - 0.92  
peptide transport - 1.0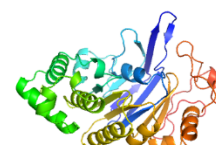**CATH-FunFams**

Oligopeptide ABC transporter ATP-binding (3.40.50.300/FF/632531) e-value 3.5e-81

**InterPro**ABC transporter-like (ProSiteProfiles score 19.48)  
AAA+ ATPase domain (SMART e-value 3.2e-15)  
ABC transporter, conserved site (ProSitePatterns)**Predicted function:** Oligopeptide ABC transporter, ATP-binding protein OppD (AmiE)

D

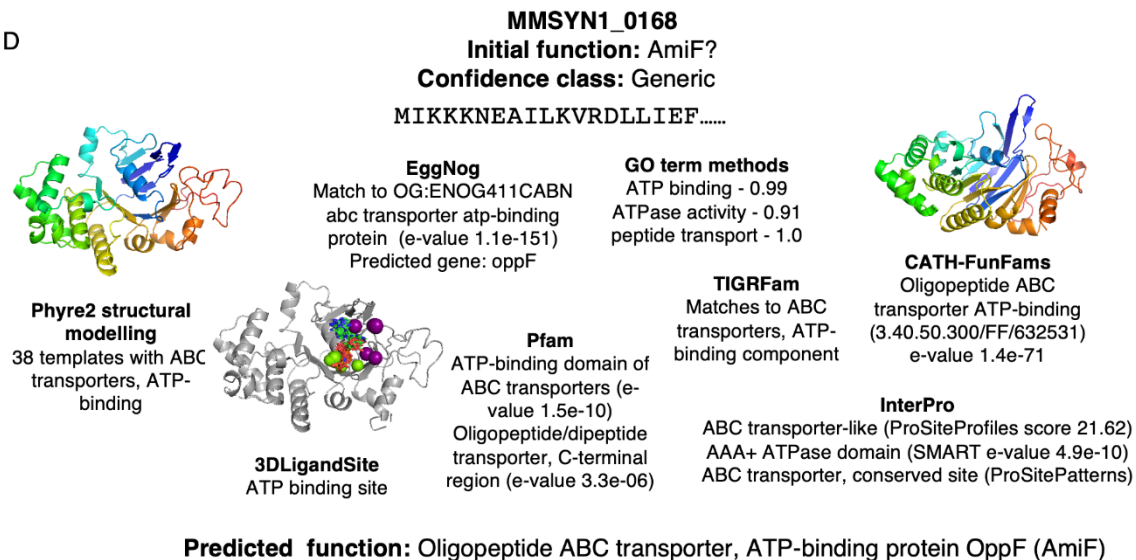

E

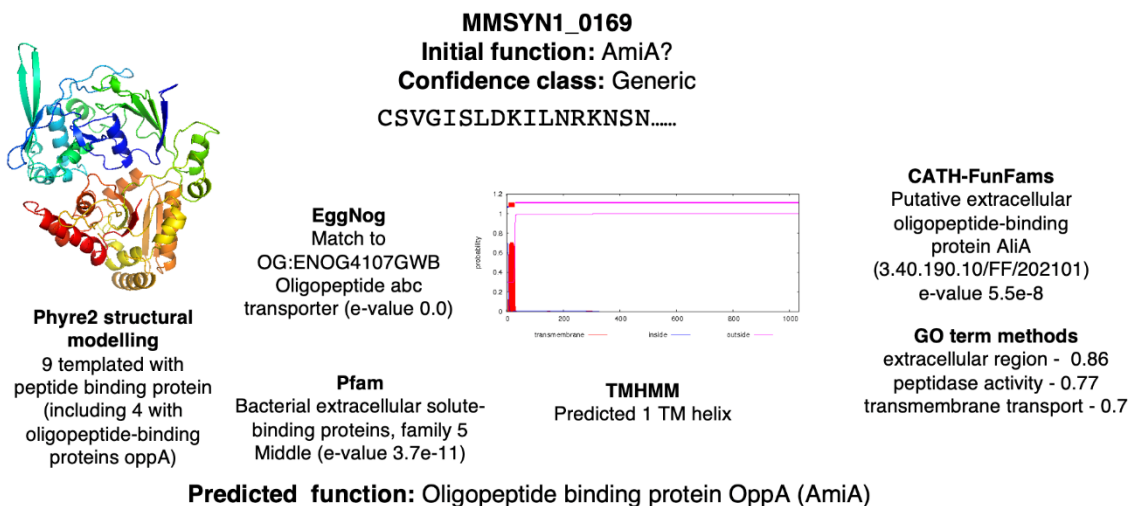

**Supplementary Figure 4.** Transporter function prediction for the OppABCDF operon. Multiple sources made confident prediction for the proteins of the oligopeptide transporter system OppABCDF (AmiABCDE). These proteins form an operon in the original *M. mycoides* subsp. capri and in the minimal genome. A) Permease OppB (AmiC) B) Permease OppC (AmiD) C) ATP-binding protein OppD (AmiE) D) ATP-binding protein OppF (AmiF) E) Oligopeptide binding protein OppA (AmiA).

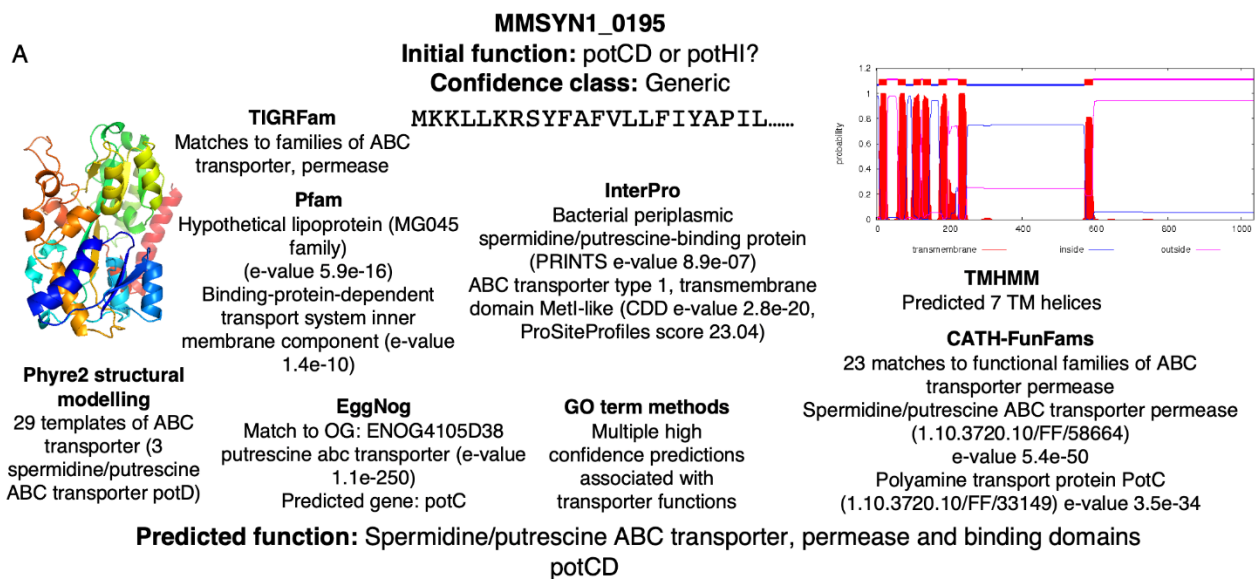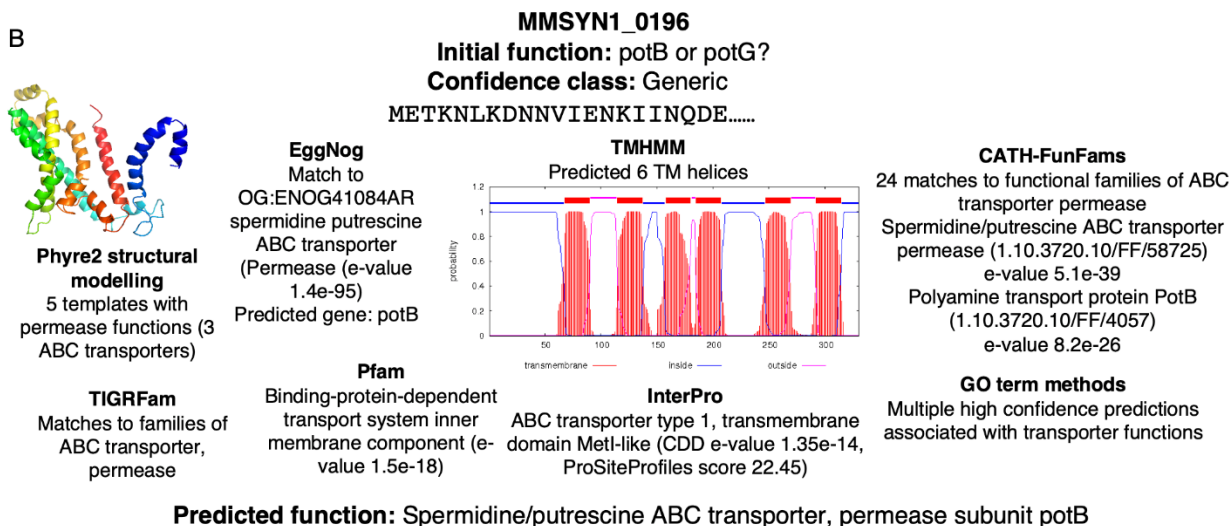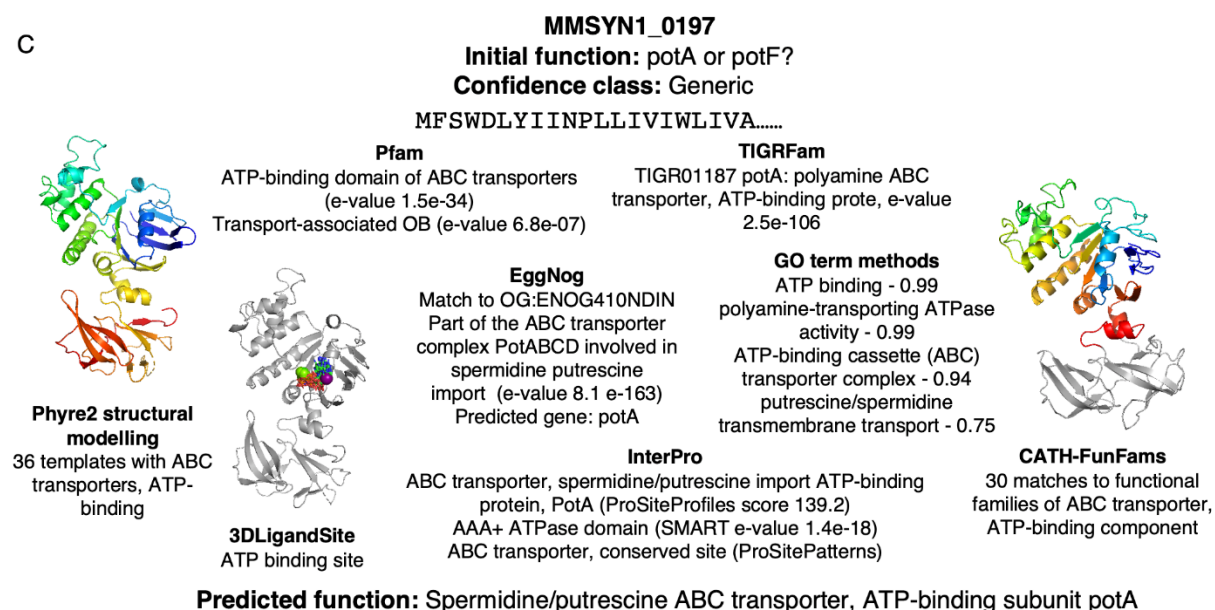

**Supplementary Figure 5.** Transporter function prediction for the potABCD operon. Multiple sources made confident prediction for the of the spermidine/putrescine transporter system

potABCD were moved to the Putative class based on function predicted using confident results from multiple sources. These proteins form an operon in the original *M. mycoides* subsp. *capri* and in the minimal genome. A) Permease subunit potCD B) Permease subunit potB C) ATP-binding subunit potA.

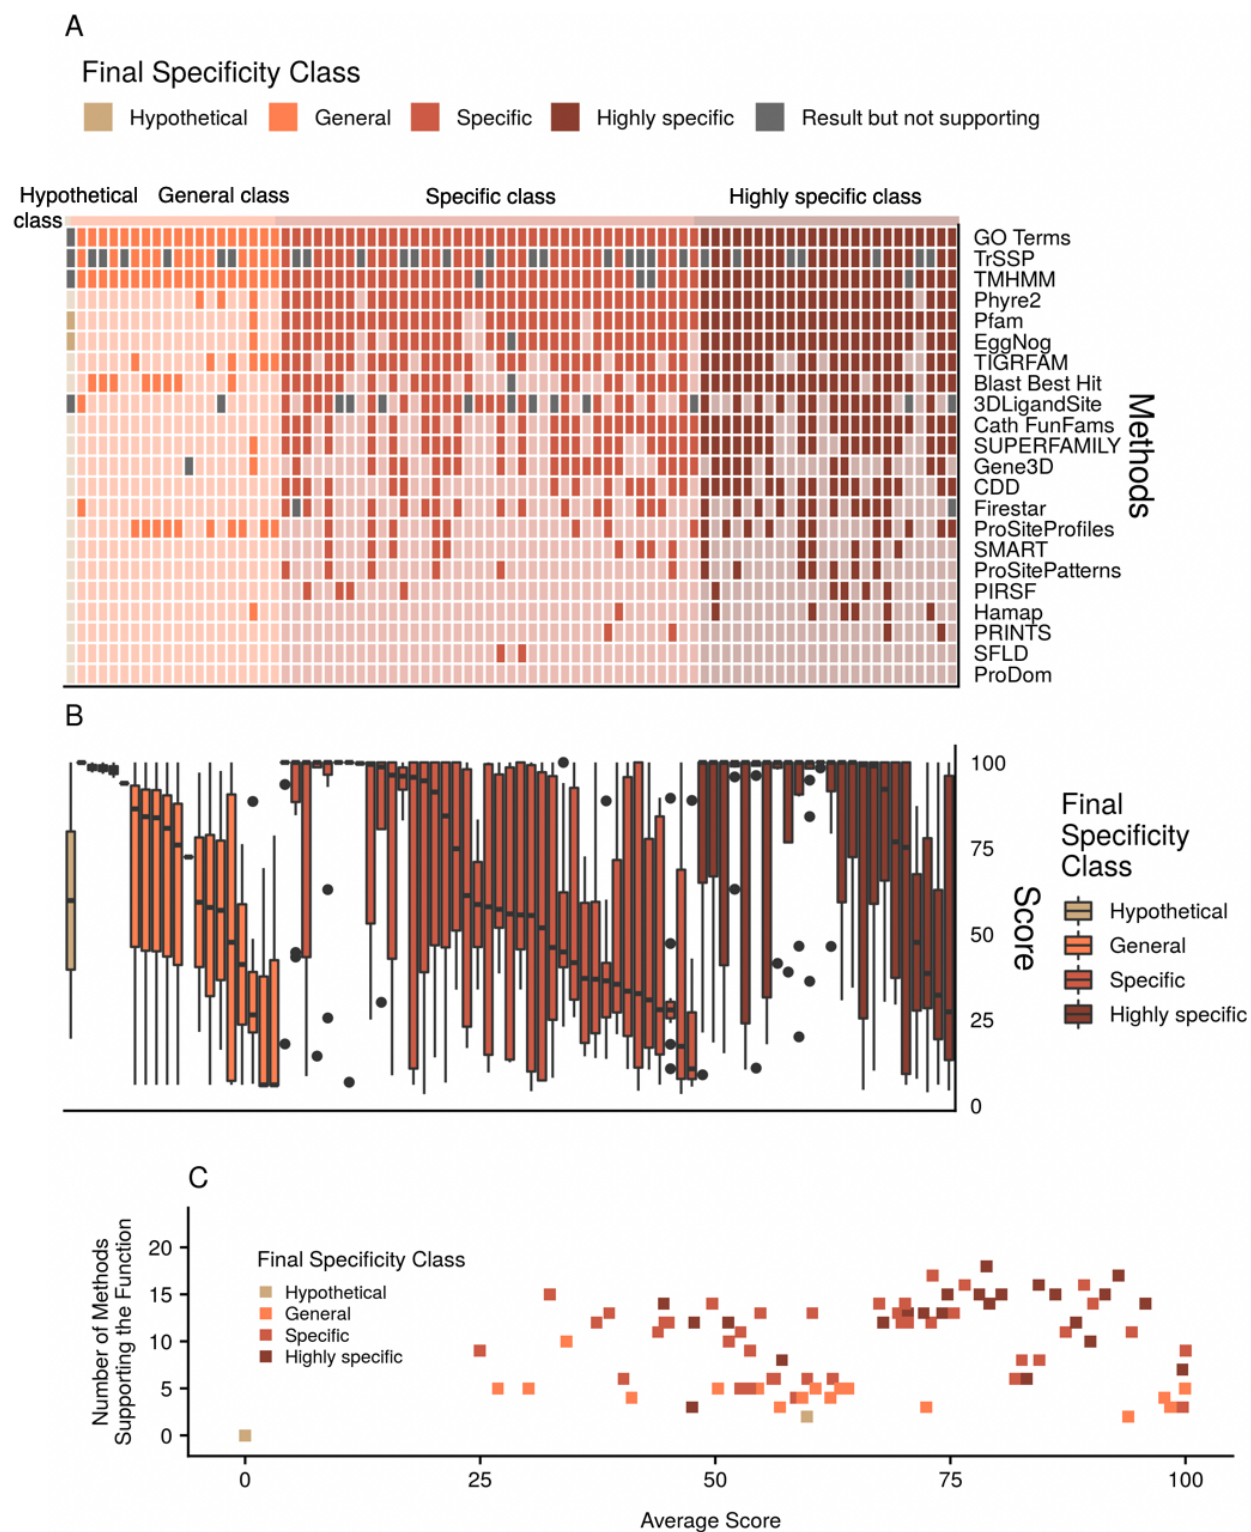

**Supplementary Figure 6.** Functional annotations where confidence was increased. This figure shows the proteins of unknown function that remained in the same specificity class. Results for each specificity class are represented by a different colour: beige for the Hypothetical specificity class, orange – General, light brown – Specific and dark brown – Highly specific. A) Each column represents a protein in the minimal genome and the squares

show the methods that made predictions (darker colours indicate support of the final prediction), grey squares indicate predictions that did not support the function, light squares indicate that a method did not make a prediction. Proteins are grouped by their initial specificity class (Hypothetical, General, Specific and Highly specific) B) Boxplot showing the distribution of scores associated with the annotated functions. Proteins are grouped by their initial specificity class. Horizontal lines represent the median, the lower and upper hinge show respectively first quartile and third quartile, and lower and upper whisker include scores from first quartile to  $(\text{distance between the first and third quartile}) \times 1.5$  (for lower whisker) and from third quartile to  $(\text{distance between the first and third quartile}) \times 1.5$  (for upper whisker). Any scores outside of these intervals are shown as points (outliers). C) Number of methods supporting the function and the average score. Each point represents a protein. Note that the point at 0,0 represents multiple proteins classed as Hypothetical where it was not possible to assign any function.

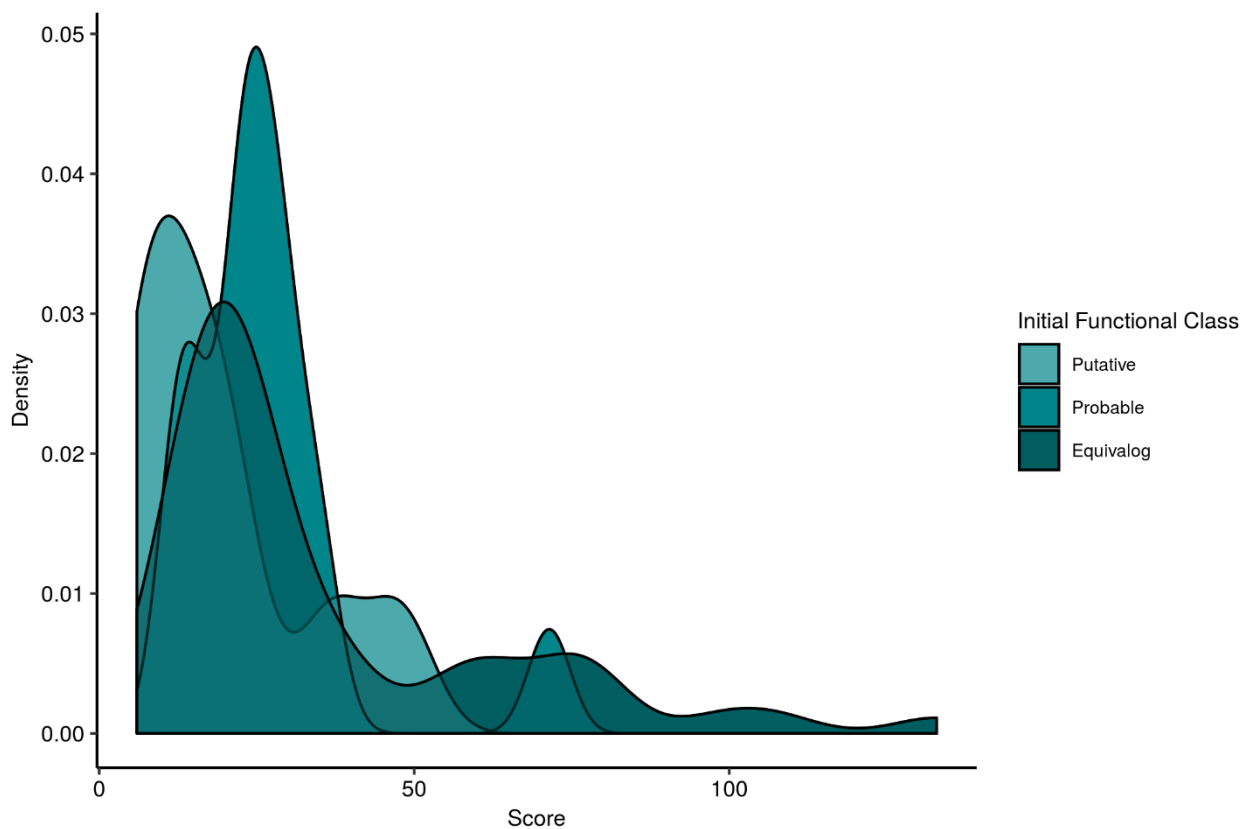

**Supplementary Figure 7.** Distribution of scores for matches to HAMAP. This the scores for HAMAP results for the minimal genome proteins of known function (Putative, Probable and Equivalog functional classes) are plotted. Results for each functional class are represented by a different colour: light turquoise – Putative, turquoise – Probable, dark turquoise – Equivalog.

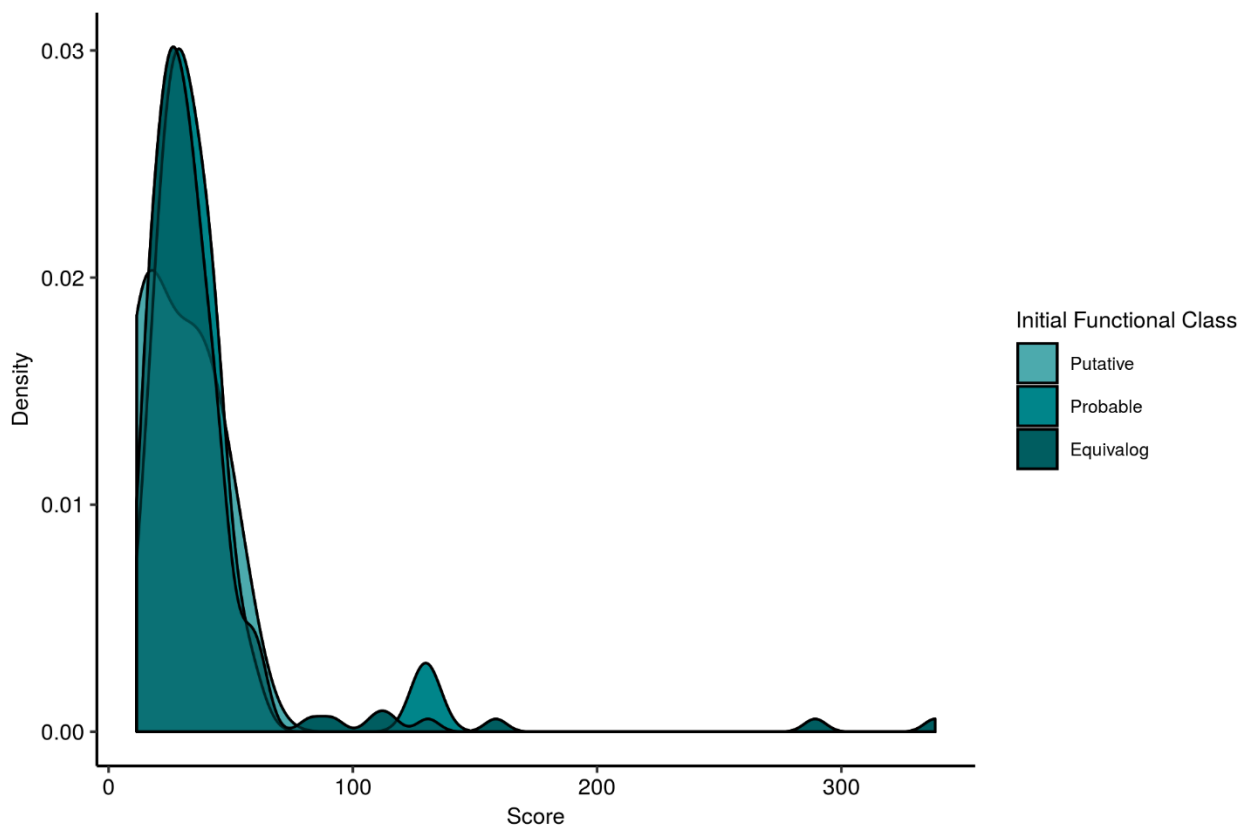

**Supplementary Figure 8.** Distribution of scores from ProSiteProfiles results. This figure plots the scores for ProSiteProfiles results for the minimal genome proteins of known function (Putative, Probable and Equivalog functional classes). Results for each functional class are represented by a different colour: light turquoise – Putative, turquoise – Probable, dark turquoise – Equivalog.

## Supplementary Tables

| General                                     | Specific                               | Highly specific                                         |
|---------------------------------------------|----------------------------------------|---------------------------------------------------------|
| Transcription factor                        | Transcriptional regulator, RpiR family | whiA; Sporulation transcription regulator WhiA          |
| Ribosomal protein                           | Ribosomal protein L7Ae/L30e family     | rpmH; 50S ribosomal protein L34                         |
| Transmembrane protein, likely a transporter | ABC transporter, ATP-binding protein   | oppD; Oligopeptide ABC transporter, ATP-binding protein |
| Membrane metallopeptidase                   | Transmembrane peptidase, C39 family    | pepQ; Xaa-Pro dipeptidase                               |
| DNA-binding protein                         | ATP-dependent DNA helicase             | polA; DNA polymerase I                                  |

**Supplementary Table 1. Examples of protein functions for the specificity classes.**

| Methods                         | Number of proteins |               |    |               | Percentage  |               |     |               |
|---------------------------------|--------------------|---------------|----|---------------|-------------|---------------|-----|---------------|
|                                 | Yes (final)        | Yes (general) | No | No prediction | Yes (final) | Yes (general) | No  | No prediction |
| eggNOG- Mapper                  | 55                 | 22            | 1  | 71            | 37%         | 15%           | 1%  | 48%           |
| GO Terms                        | 53                 | 80            | 0  | 16            | 36%         | 54%           | 0%  | 11%           |
| Phyre2                          | 53                 | 32            | 0  | 64            | 36%         | 21%           | 0%  | 43%           |
| BLAST against UniProt top match | 51                 | 20            | 1  | 77            | 34%         | 13%           | 1%  | 52%           |
| Pfam                            | 49                 | 34            | 0  | 66            | 33%         | 23%           | 0%  | 44%           |
| CATH FunFams                    | 45                 | 16            | 2  | 86            | 30%         | 11%           | 1%  | 58%           |
| TIGRFAM                         | 41                 | 24            | 1  | 83            | 28%         | 16%           | 1%  | 56%           |
| InterPro ProSiteProfiles        | 21                 | 12            | 0  | 116           | 14%         | 8%            | 0%  | 78%           |
| InterPro CDD                    | 21                 | 21            | 0  | 107           | 14%         | 14%           | 0%  | 72%           |
| InterPro SUPERFAMILY            | 21                 | 40            | 0  | 88            | 14%         | 27%           | 0%  | 59%           |
| TrSSP                           | 14                 | 71            | 48 | 16            | 9%          | 48%           | 32% | 11%           |
| InterPro Gene3D                 | 14                 | 28            | 1  | 106           | 9%          | 19%           | 1%  | 71%           |
| InterPro PIRSF                  | 7                  | 4             | 0  | 138           | 5%          | 3%            | 0%  | 93%           |
| InterPro HAMAP                  | 7                  | 1             | 0  | 141           | 5%          | 1%            | 0%  | 95%           |
| InterPro SMART                  | 7                  | 11            | 0  | 131           | 5%          | 7%            | 0%  | 88%           |
| TMHMM                           | 6                  | 122           | 5  | 16            | 4%          | 82%           | 3%  | 11%           |
| InterPro ProSitePatterns        | 4                  | 12            | 0  | 133           | 3%          | 8%            | 0%  | 89%           |
| InterPro PRINTS                 | 3                  | 4             | 0  | 142           | 2%          | 3%            | 0%  | 95%           |
| InterPro SFLD                   | 2                  | 1             | 0  | 146           | 1%          | 1%            | 0%  | 98%           |
| 3DLigandSite                    | 0                  | 44            | 20 | 85            | 0%          | 30%           | 13% | 57%           |
| Firestar                        | 0                  | 35            | 2  | 112           | 0%          | 23%           | 1%  | 75%           |
| InterPro ProDom                 | 0                  | 1             | 0  | 148           | 0%          | 1%            | 0%  | 99%           |

**Supplementary Table 2.** Comparison of the predictions made by individual methods and the final annotation assigned by the combination of methods. For each individual method we counted the predictions that agreed with the final annotation assigned to the protein (column yes – final) and if they more generally agreed with the assigned function (yes – general).

| Method 1        | Method 2        | Number of common proteins | Percentage |
|-----------------|-----------------|---------------------------|------------|
| EggNOG          | BLAST - UniProt | 38                        | 25.5       |
| EggNOG          | Pfam            | 31                        | 20.81      |
| EggNOG          | Phyre2          | 30                        | 20.13      |
| Phyre2          | Pfam            | 28                        | 18.79      |
| Phyre2          | BLAST - UniProt | 26                        | 17.45      |
| BLAST - UniProt | Pfam            | 24                        | 16.11      |
| EggNOG          | GO Terms        | 14                        | 9.4        |
| GO Terms        | Phyre2          | 13                        | 8.72       |
| GO Terms        | BLAST - UniProt | 12                        | 8.05       |
| GO Terms        | Pfam            | 9                         | 6.04       |

**Supplementary Table 3.** Common predictions made by the five methods with greatest agreement with the final annotation. For each pair of methods the number of proteins where both methods make the same prediction as the final annotation is shown.
